# Supplementary material
Source: ML conference proceedings conference paper supplement (https://proceedings.neurips.cc/paper_files/paper/2023/hash/1e680f115a22d60cbc228a0c6dae5936-Abstract.html)
Supplement: Supplementary file 1 [file 1e680f115a22d60cbc228a0c6dae5936-Supplemental-Conference.pdf]

---

# What Do Deep Saliency Models Learn about Visual Attention? (Supplementary Materials)

---

**Shi Chen**   **Ming Jiang**   **Qi Zhao**  
Department of Computer Science and Engineering,  
University of Minnesota  
{chen4595, mjiang, qzhao}@umn.edu

The supplementary materials provide additional results to complement our analyses in the main paper, and elaborate on the implementation details of our visualization method.

## 1 Supplementary Results

In the main paper, we visualize the weights of different semantic categories (*e.g.*, action, social, and scene) for saliency prediction in various scenarios. Here we provide complementary results on detailed semantics, which are used to derive the results shown in the main paper (see the listed sections below). In particular,

- Figure 1 shows the weights of detailed semantics for DINet [1] trained on different datasets (Section 4.2 of the main paper).
- Figure 2 shows the weights of detailed semantics for models with three different architectural designs trained on the SALICON [2] dataset (Section 4.3 of the main paper).
- Figure 3 shows the weights of detailed semantics for models trained on the attention of people with and without autism (Section 4.4 of the main paper).
- Figure 4 shows the weights of detailed semantics for models trained on stimuli eliciting positive, negative, and neutral emotions (Section 4.4 of the main paper).
- Figure 5 shows the weights of detailed semantics for models trained on attention collected at different time periods (Section 4.4 of the main paper).
- Figure 6 summarizes the results in Figure 3, 4, and 5, by visualizing their corresponding weights of semantic categories.

## 2 Supplementary Details for Visualizing the Distribution of Bases

To identify the underlying rationales for the successes and failures of saliency models, in the main paper, we perform a qualitative analysis by visualizing the probabilistic distributions of trainable bases. In this section, we provide the details of the visualization approach.

Specifically, we first identify the top-10% of bases that contribute the most positively or negatively to the saliency map. The contributions are based on the model parameters in the final layer (*i.e.*,  $W_{sal}$  in Equation 3 of the main paper). After identifying these most impactful bases, we compute their corresponding probabilistic distributions (*i.e.*,  $\alpha$  in Equation 1 of the main paper), and spatially accumulate the distribution for bases at different positions. The distributions for positive and negative bases are weighted by multiplying 1 or -1, respectively, to highlight their polarities with different colors. Finally, we normalize the spatial distribution to range  $[-1, 1]$  and overlay it with the original image for visualization.

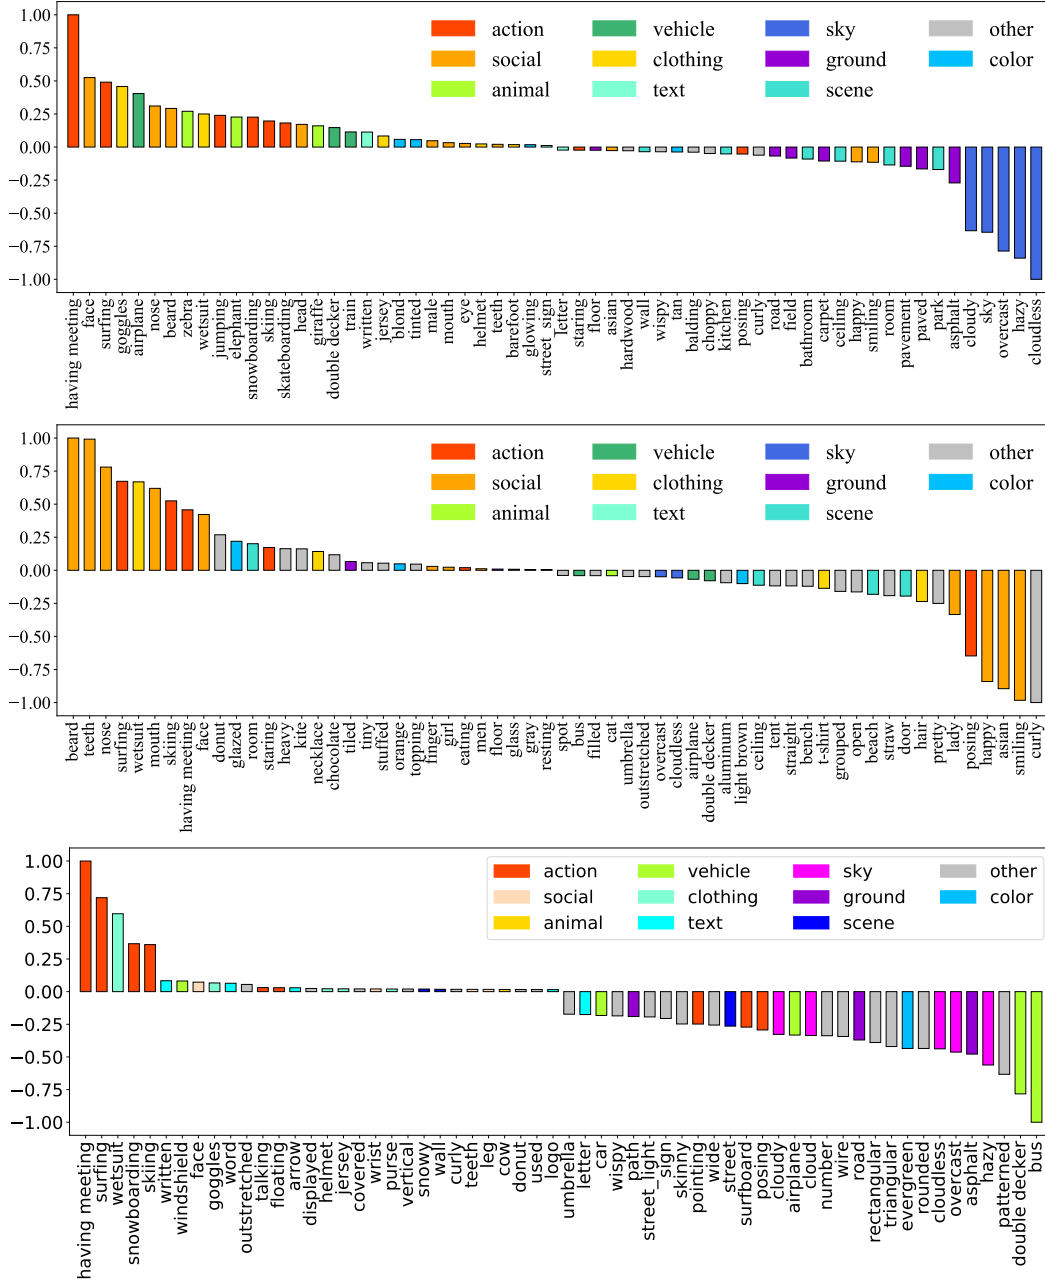

Figure 1: Weights of detailed semantics for DInet trained on SALICON [2] (top), OSIE [3] (middle), and MIT [4] datasets (bottom).

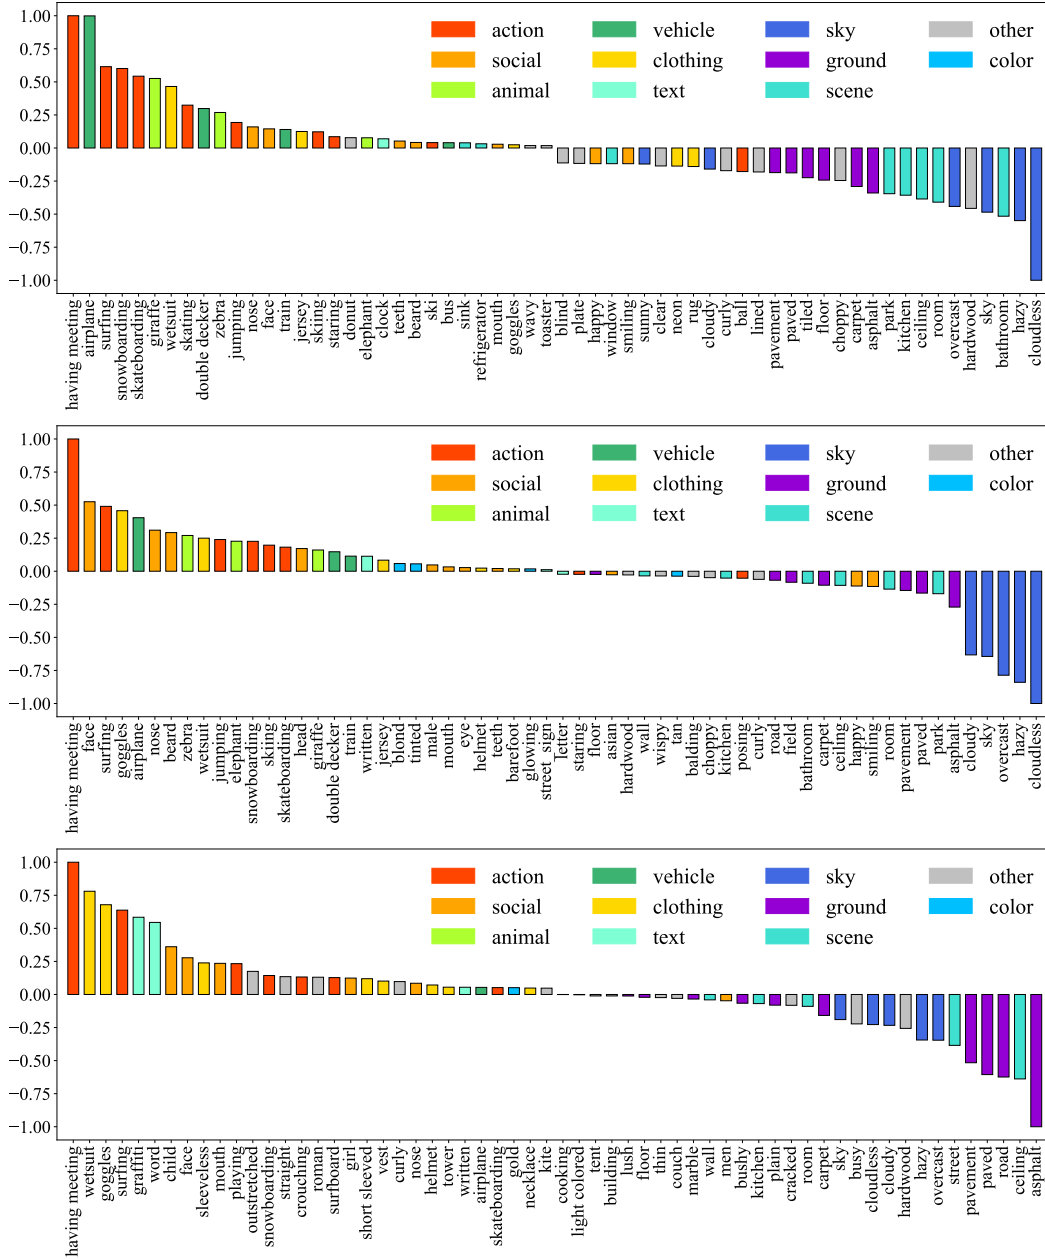

Figure 2: Weights of detailed semantics for SALICON [5] (top), DInet [1] (middle), and TranSalNet [6] (bottom). All models are trained on the SALICON [2] dataset.

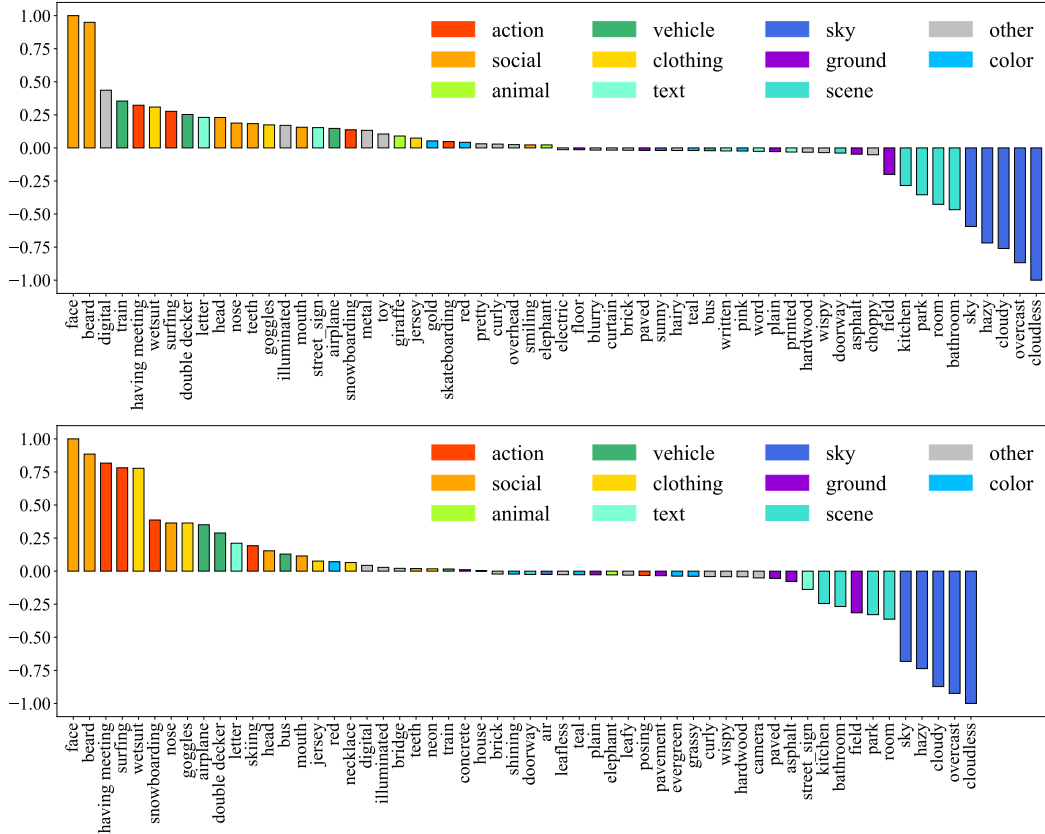

Figure 3: Weights of detailed semantics for models trained on attention for people with (top) and without (bottom) autism. Experiments are conducted on the eye-tracking dataset proposed in [7].

## References

- [1] Sheng Yang, Guosheng Lin, Qiuping Jiang, and Weisi Lin. A dilated inception network for visual saliency prediction. *TMM*, 22(8):2163–2176, 2020.
- [2] Ming Jiang, Shengsheng Huang, Juanyong Duan, and Qi Zhao. Salicon: Saliency in context. In *CVPR*, pages 1072–1080, 2015.
- [3] Juan Xu, Ming Jiang, Shuo Wang, Mohan S. Kankanhalli, and Qi Zhao. Predicting human gaze beyond pixels. *Journal of Vision*, 14(1):1–20, 2014.
- [4] Tilke Judd, Krista Ehinger, Frédo Durand, and Antonio Torralba. Learning to predict where humans look. In *ICCV*, pages 2106–2113, 2009.
- [5] Xun Huang, Chengyao Shen, Xavier Boix, and Qi Zhao. Salicon: Reducing the semantic gap in saliency prediction by adapting deep neural networks. In *ICCV*, pages 262–270, 2015.
- [6] Jianxun Lou, Hanhe Lin, David Marshall, Dietmar Saupe, and Hantao Liu. Transalnet: Towards perceptually relevant visual saliency prediction. *Neurocomputing*, 494:455–467, 2022.
- [7] Shuo Wang, Ming Jiang, Xavier Morin Duchesne, Elizabeth A. Laugeson, Daniel P. Kennedy, Ralph Adolphs, and Qi Zhao. Atypical visual saliency in autism spectrum disorder quantified through model-based eye tracking. *Neuron*, 88(3):604 – 616, 2015.
- [8] Shaojing Fan, Zhiqi Shen, Ming Jiang, Bryan L Koenig, Juan Xu, Mohan S Kankanhalli, and Qi Zhao. Emotional attention: A study of image sentiment and visual attention. In *CVPR*, pages 7521–7531, 2018.
- [9] Camilo Fosco, Anelise Newman, Pat Sukhum, Yun Bin Zhang, Nanxuan Zhao, Aude Oliva, and Zoya Bylinskii. How much time do you have? Modeling multi-duration saliency. In *CVPR*, pages 4472–4481, 2020.

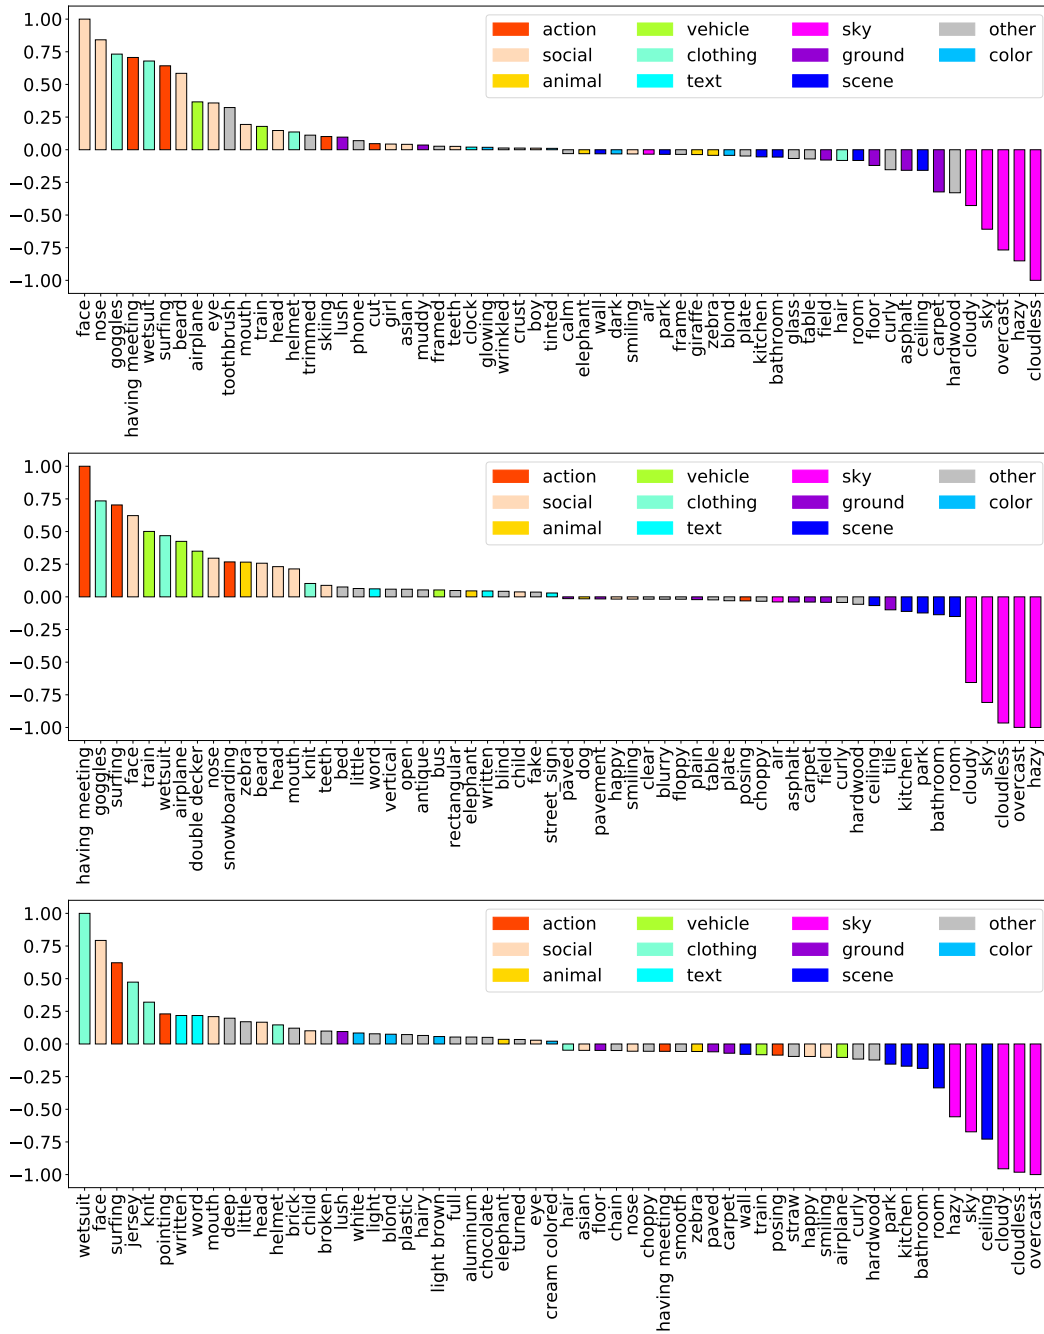

Figure 4: Weights of detailed semantics for models trained on stimuli eliciting positive (top), negative (middle), and neutral (bottom) emotions. Experiments are conducted on the EMoD [8] saliency dataset.

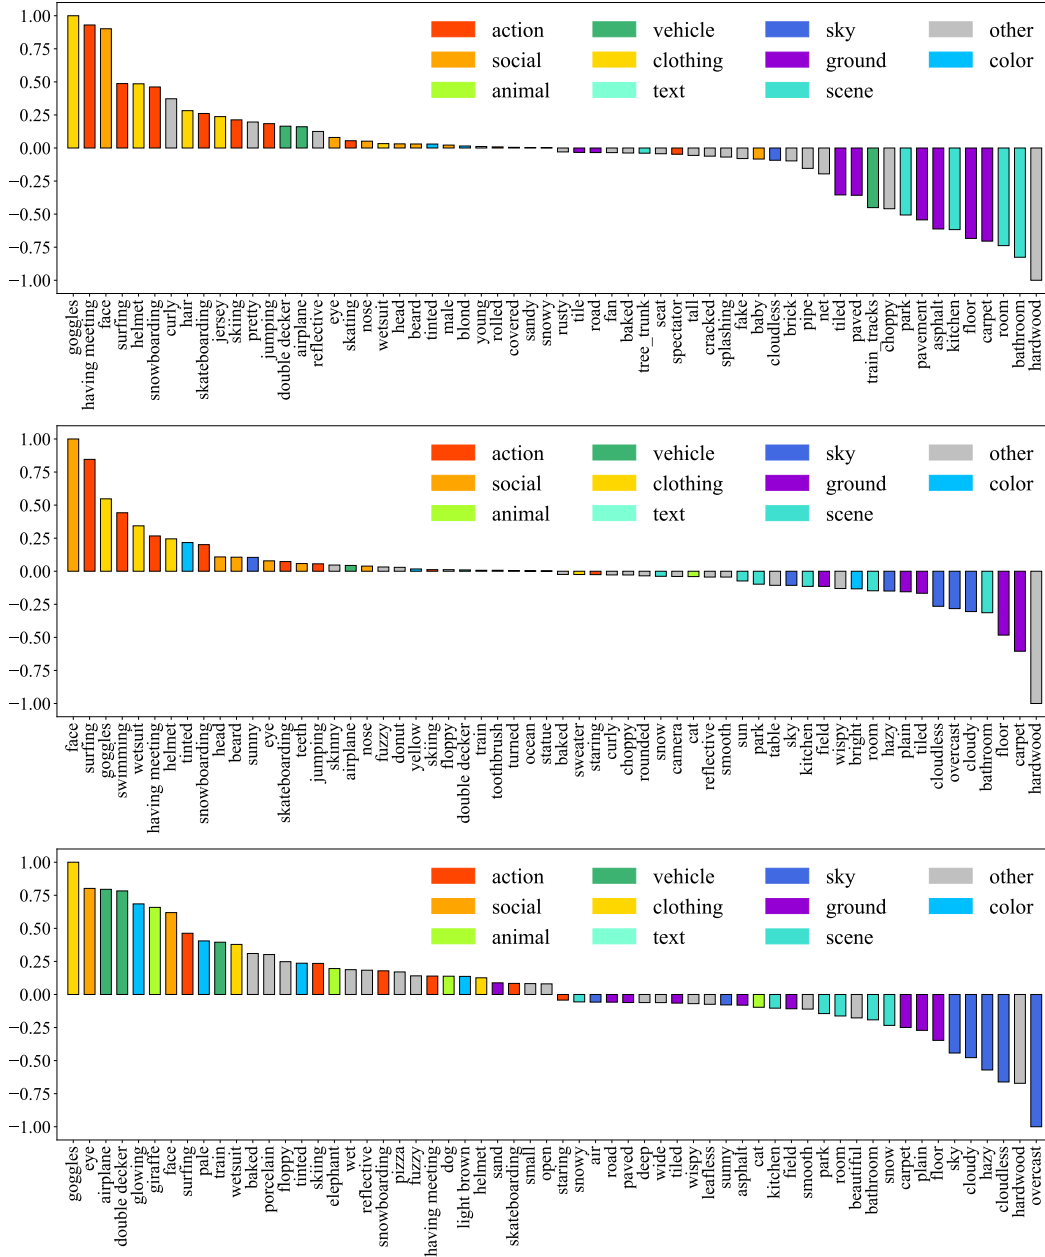

Figure 5: Weights of detailed semantics for models trained on attention collected at 0.5 (top), 3 (middle), and 5 (bottom) seconds. The data is adopted from the CodeCharts1K [9] dataset.

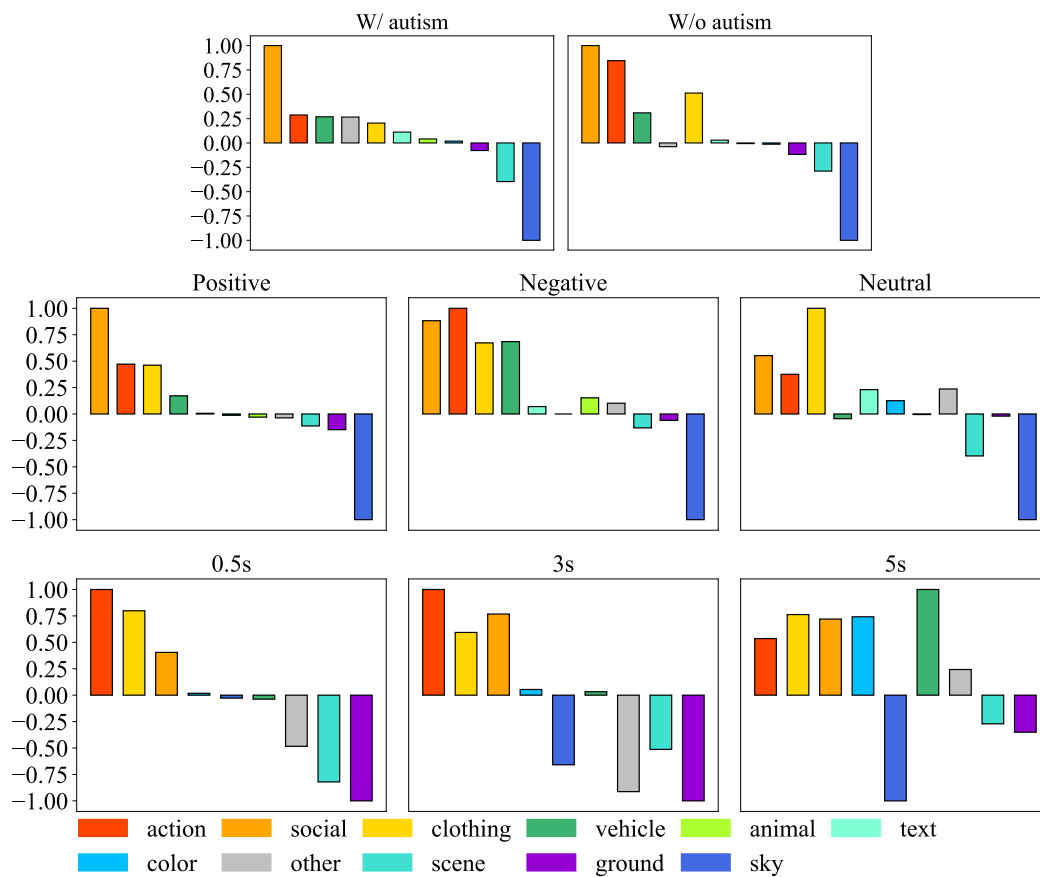

Figure 6: Weights of different semantic categories for attention in three different scenarios. Specifically, from top to bottom are the attention for people with or without autism, attention for stimuli eliciting positive, negative, and neutral emotions, and attention collected at different time periods.
